# Supplementary material for: Cortical activity and functional organisation during ocular pursuit is affected by concurrent upper limb movement
Source: Research Square preprint supplement (doi:10.21203/rs.3.rs-6928711/v1), 2025-07-08
Supplement: Supplementary file 1 [file ef4bb68b2da765ec9f9e26d8.docx]

| **ROI** | **Chromophore** | **Accepted model** | **Effect** | **Chisq** | **Df** | **P value** | **R2C** |
| --- | --- | --- | --- | --- | --- | --- | --- |
| MPFC | O2Hb | Data ~ Occlusion * Tracking + Test * Tracking + (1 | Subject) | Occlusion | 1.45 | 1 | 0.23 | 0.15 |
|  |  |  | Tracking | 74.28 | 1 | < 0.001 *** |  |
|  |  |  | Test | 10.82 | 1 | < 0.01 ** |  |
|  |  |  | Occlusion x Tracking | 4.92 | 1 | < 0.05 * |  |
|  |  |  | Tracking x Test | 10.94 | 1 | < 0.001 *** |  |
|  |  |  |  |  |  |  |  |
|  |  |  |  |  |  |  |  |
| DLPFC | O2Hb | Data ~ Tracking * Test + Occlusion * Tracking + (1 | Subject) | Tracking | 41.67 | 1 | < 0.001 *** | 0.09 |
|  |  |  | Test | 20.75 | 1 | < 0.001 *** |  |
|  |  |  | Occlusion | 0.38 | 1 | 0.54 |  |
|  |  |  | Tracking x Test | 13.51 | 1 | < 0.001 *** |  |
|  |  |  | Tracking x Occlusion | 15.91 | 1 | < 0.001 *** |  |
|  |  |  |  |  |  |  |  |
|  |  |  |  |  |  |  |  |
| FEF | O2Hb | Data ~ Occlusion * Tracking + (1 | Subject) | Occlusion | 2.96 | 1 | 0.09 | 0.13 |
|  |  |  | Tracking | 0.57 | 1 | 0.45 |  |
|  |  |  | Occlusion x Tracking | 10.89 | 1 | < 0.001*** |  |
|  |  |  |  |  |  |  |  |
|  |  |  |  |  |  |  |  |
| MC | O2Hb | Data ~ Occlusion * Tracking + (1 | Subject) | Occlusion | 0.003 | 1 | 0.96 | 0.16 |
|  |  |  | Tracking | 0.03 | 1 | 0.87 |  |
|  |  |  | Occlusion x Tracking | 14.50 | 1 | < 0.001 *** |  |
|  |  |  |  |  |  |  |  |
|  |  |  |  |  |  |  |  |
| IPL | O2Hb | Data ~ Occlusion * Tracking + Occlusion * Test + Tracking * Test + (1 | Subject) | Occlusion | 1.50 | 1 | 0.22 | 0.15 |
|  |  |  | Tracking | 0.16 | 1 | 0.69 |  |
|  |  |  | Test | 1.09 | 1 | 0.30 |  |
|  |  |  | Occlusion x Tracking | 3.82 | 1 | 0.051 |  |
|  |  |  | Occlusion x Test | 4.50 | 1 | < 0.05 * |  |
|  |  |  | Tracking x Test | 13.11 | 1 | < 0.001 *** |  |
|  |  |  |  |  |  |  |  |
|  |  |  |  |  |  |  |  |
| SPL | O2Hb | Data ~ Tracking * Test + Occlusion * Test + (1 | Subject) | Tracking | 5.79 | 1 | < 0.05 * | 0.15 |
|  |  |  | Test | 0.32 | 1 | 0.57 |  |
|  |  |  | Occlusion | 0.07 | 1 | 0.80 |  |
|  |  |  | Tracking x Test | 5.17 | 1 | < 0.05 * |  |
|  |  |  | Test x Occlusion | 6.40 | 1 | < 0.05 * |  |
|  |  |  |  |  |  |  |  |
|  |  |  |  |  |  |  |  |
| VC | O2Hb | Data ~ Tracking * Test + (1 | Subject) | Tracking | 17.91 | 1 | < 0.001 *** | 0.12 |
|  |  |  | Test | 0.95 | 1 | 0.33 |  |
|  |  |  | Tracking x Test | 10.15 | 1 | < 0.01 ** |  |
|  |  |  |  |  |  |  |  |
|  |  |  |  |  |  |  |  |
| MPFC | HHb | Data ~ Occlusion * Tracking + Tracking * Test + (1 | Subject) | Occlusion | 5.73 | 1 | < 0.05 * | 0.14 |
|  |  |  | Tracking | 12.60 | 1 | < 0.001 *** |  |
|  |  |  | Test | 0.14 | 1 | 0.70 |  |
|  |  |  | Occlusion x Tracking | 5.66 | 1 | < 0.05 * |  |
|  |  |  | Tracking x Test | 13.79 | 1 | < 0.001 *** |  |
|  |  |  |  |  |  |  |  |
|  |  |  |  |  |  |  |  |
| DLPFC | HHb | Data ~ Tracking * Occlusion * Test + (1 | Subject) | Tracking | 6.02 | 1 | < 0.05 * | 0.10 |
|  |  |  | Occlusion | 1.95 | 1 | 0.16 |  |
|  |  |  | Test | 0.72 | 1 | 0.40 |  |
|  |  |  | Tracking x Occlusion | 0.28 | 1 | 0.60 |  |
|  |  |  | Tracking x Test | 9.79 | 1 | < 0.01 ** |  |
|  |  |  | Occlusion x Test | 0.70 | 1 | 0.40 |  |
|  |  |  | Tracking x Occlusion x Test | 17.15 | 1 | < 0.001 *** |  |
|  |  |  |  |  |  |  |  |
|  |  |  |  |  |  |  |  |
| FEF | HHb | Data ~ Tracking * Occlusion * Test + (1 | Subject) | Tracking | 0.17 | 1 | 0.68 | 0.19 |
|  |  |  | Occlusion | 2.48 | 1 | 0.12 |  |
|  |  |  | Test | 3.96 | 1 | < 0.05 * |  |
|  |  |  | Tracking x Occlusion | 0.62 | 1 | 0.43 |  |
|  |  |  | Tracking x Test | 3.30 | 1 | 0.07 |  |
|  |  |  | Occlusion x Test | 0.40 | 1 | 0.53 |  |
|  |  |  | Tracking x Occlusion x Test | 9.06 | 1 | < 0.01 ** |  |
|  |  |  |  |  |  |  |  |
|  |  |  |  |  |  |  |  |
| MC | HHb | Data ~ Tracking * Occlusion + Tracking * Test + (1 | Subject) | Tracking | 15.82 | 1 | < 0.001 *** | 0.12 |
|  |  |  | Occlusion | 7.23 | 1 | < 0.01 ** |  |
|  |  |  | Test | 2.73 | 1 | 0.1 |  |
|  |  |  | Tracking x Occlusion | 6.45 | 1 | < 0.05 * |  |
|  |  |  | Tracking x Test | 7.03 | 1 | < 0.01 ** |  |
|  |  |  |  |  |  |  |  |
|  |  |  |  |  |  |  |  |
| IPL | HHb | Data ~ Occlusion * Test + (1 | Subject) | Occlusion | 0.46 | 1 | 0.50 | 0.10 |
|  |  |  | Test | 0.58 | 1 | 0.45 |  |
|  |  |  | Occlusion x Test | 13.87 | 1 | < 0.001 *** |  |
|  |  |  |  |  |  |  |  |
|  |  |  |  |  |  |  |  |
| SPL | HHb | Data ~ Tracking * Test + (1 | Subject) | Tracking | 17.14 | 1 | < 0.001 *** | 0.02 |
|  |  |  | Test | 0.37 | 1 | 0.54 |  |
|  |  |  | Tracking x Test | 9.55 | 1 | < 0.01 ** |  |
|  |  |  |  |  |  |  |  |
|  |  |  |  |  |  |  |  |
| VC | HHb | Data ~ Tracking * Occlusion * Test + (1 | Subject) | Tracking | 0.52 | 1 | 0.47 | 0.1 |
|  |  |  | Occlusion | 0.43 | 1 | 0.51 |  |
|  |  |  | Test | 0.0085 | 1 | 0.93 |  |
|  |  |  | Tracking x Occlusion | 1.25 | 1 | 0.26 |  |
|  |  |  | Tracking x Test | 0.46 | 1 | 0.50 |  |
|  |  |  | Occlusion x Test | 0.0006 | 1 | 0.98 |  |
|  |  |  | Tracking x Occlusion x Test | 4.40 | 1 | < 0.05 * |  |
|  |  |  |  |  |  |  |  |
|  |  |  |  |  |  |  |  |

| **Effector** | **Dependant Variable** | **Accepted model** | **Effect** | **Chisq** | **Df** | **P value** | **R2C** |
| --- | --- | --- | --- | --- | --- | --- | --- |
| Eye | Velocity | data ~ Occlusion * Tracking + Occlusion * Test + (1 | Participants) | Occlusion | 10833.97 | 1 | < 0.001 *** | 0.79 |
|  |  |  | Tracking | 201.89 | 1 | < 0.001 *** |  |
|  |  |  | Test | 0.11 | 1 | 0.74 |  |
|  |  |  | Occlusion x Tracking | 11.85 | 1 | < 0.001 *** |  |
|  |  |  | Occlusion x Test | 11.94 | 1 | < 0.001 *** |  |
|  |  |  |  |  |  |  |  |
|  |  |  |  |  |  |  |  |
| Eye | Saccadic displacement | data ~ Occlusion * Tracking + Occlusion * Test + (1 | Participant) | Occlusion | 1268.81 | 1 | < 0.001 *** | 0.39 |
|  |  |  | Tracking | 32.80 | 1 | < 0.001 *** |  |
|  |  |  | Test | 0.67 | 1 | 0.41 |  |
|  |  |  | Occlusion x Tracking | 19.86 | 1 | < 0.001 *** |  |
|  |  |  | Occlusion x Test | 4.065 | 1 | < 0.05 * |  |
|  |  |  |  |  |  |  |  |
|  |  |  |  |  |  |  |  |
| Hand | Velocity | data ~ Occlusion * Test + (1 | Participants) | Occlusion | 43.41 | 1 | < 0.001 *** | 0.14 |
|  |  |  | Test | 47.40 | 1 | < 0.001 *** |  |
|  |  |  | Occlusion x Test | 31.36 | 1 | < 0.001 *** |  |
|  |  |  |  |  |  |  |  |
|  |  |  |  |  |  |  |  |

| **Graph metric** | | **Accepted model** | **Effect** | **Chisq** | **Df** | **P value** | **R2C** |
| --- | --- | --- | --- | --- | --- | --- | --- |
| Efficiency  Local | | Data ~ Tracking * Occlusion * Test + (1 | Subject) | Tracking | 1.37 | 1 | 0.24 | 0.055 |
|  | Occlusion | 1.45 | 1 | 0.23 |  |
|  | Test | 12.75 | 1 | < 0.001 *** |  |
|  | Tracking x Occlusion | 0.71 | 1 | 0.40 |  |
|  | Tracking x Test | 34.20 | 1 | < 0.001 *** |  |
|  | Occlusion x Test | 1.95 | 1 | 0.16 |  |
|  | Tracking x Occlusion x Test | 5.58 | 1 | < 0.05 * |  |
|  |  |  |  |  |  |  |  |
| Efficiency  Global | | Data ~ 1 + (1 | Subject) | NA |  |  |  | 0.13 |
